# Supplementary material for: Biochemical Composition and Related Potential Nutritional and Health Properties of Sobrassada de Mallorca
Source: MDPI journal article supplement (doi:10.3390/foods13050761), 2024-02-29

**Supplementary Materials** of “Biochemical composition and related potential nutritional and health properties of *Sobrassada de Mallorca*” by Galmés et al.

**Supplementary Table S1.** Health claims related to specific health effects for SM.

|                                                                                 |    |
|---------------------------------------------------------------------------------|----|
| <b>Function of the immune system</b>                                            | 5  |
| iron contributes to the normal function of the immune system                    |    |
| selenium contributes to the normal function of the immune system                |    |
| vitamin A contributes to the normal function of the immune system               |    |
| vitamin B <sub>6</sub> contributes to the normal function of the immune system  |    |
| vitamin B <sub>12</sub> contributes to the normal function of the immune system |    |
| <b>Contribution to normal energy-yielding metabolism</b>                        | 5  |
| iron contributes to normal energy-yielding metabolism                           |    |
| phosphorus contributes to normal energy-yielding metabolism                     |    |
| niacin contributes to normal energy-yielding metabolism                         |    |
| vitamin B <sub>6</sub> contributes to normal energy-yielding metabolism         |    |
| vitamin B <sub>12</sub> contributes to normal energy-yielding metabolism        |    |
| <b>Reduction of tiredness and fatigue</b>                                       | 4  |
| iron contributes to the reduction of tiredness and fatigue                      |    |
| niacin contributes to the reduction of tiredness and fatigue                    |    |
| vitamin B <sub>6</sub> contributes to the reduction of tiredness and fatigue    |    |
| vitamin B <sub>12</sub> contributes to the reduction of tiredness and fatigue   |    |
| <b>Maintenance of normal skin and mucous membranes</b>                          | 4  |
| vitamin A contributes to the maintenance of normal mucous membranes             |    |
| vitamin A contributes to the maintenance of normal skin                         |    |
| niacin contributes to the maintenance of normal mucous membranes                |    |
| niacin contributes to the maintenance of normal skin                            |    |
| <b>Others</b>                                                                   | 32 |
| iron contributes to normal cognitive function                                   |    |
| iron contributes to normal formation of red blood cells and hemoglobin          |    |
| iron contributes to normal oxygen transport in the body                         |    |
| iron has a role in the process of cell division                                 |    |
| iron contributes to normal cognitive development of children                    |    |
| phosphorus contributes to normal function of cell membranes                     |    |
| phosphorus contributes to the maintenance of normal bones                       |    |
| phosphorus contributes to the maintenance of normal teeth                       |    |
| phosphorus is needed for the normal growth and development of bone in children  |    |
| selenium contributes to the protection of cells from oxidative stress           |    |
| selenium contributes to normal spermatogenesis                                  |    |
| selenium contributes to the maintenance of normal hair                          |    |
| selenium contributes to the maintenance of normal nails                         |    |
| selenium contributes to the normal thyroid function                             |    |
| vitamin A contributes to normal iron metabolism                                 |    |
| vitamin A contributes to the maintenance of normal vision                       |    |
| vitamin A has a role in the process of cell specialisation                      |    |

niacin contributes to normal functioning of the nervous system  
niacin contributes to normal psychological function  
vitamin B<sub>6</sub> contributes to normal cysteine synthesis  
vitamin B<sub>6</sub> contributes to normal functioning of the nervous system  
vitamin B<sub>6</sub> contributes to normal homocysteine metabolism  
vitamin B<sub>6</sub> contributes to normal protein and glycogen metabolism  
vitamin B<sub>6</sub> contributes to normal psychological function  
vitamin B<sub>6</sub> contributes to normal red blood cell formation  
vitamin B<sub>6</sub> contributes to the regulation of hormonal activity  
vitamin B<sub>12</sub> contributes to normal functioning of the nervous system  
vitamin B<sub>12</sub> contributes to normal homocysteine metabolism  
vitamin B<sub>12</sub> contributes to normal psychological function  
vitamin B<sub>12</sub> contributes to normal red blood cell formation  
vitamin B<sub>12</sub> has a role in the process of cell division  
vitamin E contributes to the protection of cells from oxidative stress

---

**Supplementary Table S2.** Health claims (HC) related to specific health effects for SMBP.

|                                                                                 |           |
|---------------------------------------------------------------------------------|-----------|
| <b>Function of the immune system</b>                                            | <b>5</b>  |
| selenium contributes to the normal function of the immune system                |           |
| zinc contributes to the normal function of the immune system                    |           |
| vitamin A contributes to the normal function of the immune system               |           |
| vitamin B <sub>6</sub> contributes to the normal function of the immune system  |           |
| vitamin B <sub>12</sub> contributes to the normal function of the immune system |           |
| <b>Contribution to normal energy-yielding metabolism</b>                        | <b>4</b>  |
| phosphorus contributes to normal energy-yielding metabolism                     |           |
| niacin contributes to normal energy-yielding metabolism                         |           |
| vitamin B <sub>6</sub> contributes to normal energy-yielding metabolism         |           |
| vitamin B <sub>12</sub> contributes to normal energy-yielding metabolism        |           |
| <b>Maintenance of normal skin and mucous membranes</b>                          | <b>4</b>  |
| vitamin A contributes to the maintenance of normal mucous membranes             |           |
| vitamin A contributes to the maintenance of normal skin                         |           |
| niacin contributes to the maintenance of normal mucous membranes                |           |
| niacin contributes to the maintenance of normal skin                            |           |
| <b>Reduction of tiredness and fatigue</b>                                       | <b>3</b>  |
| niacin contributes to the reduction of tiredness and fatigue                    |           |
| vitamin B <sub>6</sub> contributes to the reduction of tiredness and fatigue    |           |
| vitamin B <sub>12</sub> contributes to the reduction of tiredness and fatigue   |           |
| <b>Protection of DNA, proteins and lipids from oxidative damage</b>             | <b>3</b>  |
| selenium contributes to the protection of cells from oxidative stress           |           |
| zinc contributes to the protection of cells from oxidative stress               |           |
| vitamin E contributes to the protection of cells from oxidative stress          |           |
| <b>Others</b>                                                                   | <b>41</b> |
| phosphorus contributes to normal function of cell membranes                     |           |
| phosphorus contributes to the maintenance of normal bones                       |           |
| phosphorus contributes to the maintenance of normal teeth                       |           |
| phosphorus is needed for the normal growth and development of bone in children  |           |
| selenium contributes to normal spermatogenesis                                  |           |
| selenium contributes to the maintenance of normal hair                          |           |
| selenium contributes to the maintenance of normal nails                         |           |
| selenium contributes to the normal thyroid function                             |           |
| zinc contributes to normal carbohydrate metabolism                              |           |
| zinc contributes to normal cognitive function                                   |           |
| zinc contributes to normal DNA synthesis                                        |           |
| zinc contributes to normal fertility and reproduction                           |           |
| zinc contributes to normal macronutrient metabolism                             |           |
| zinc contributes to normal metabolism of fatty acids                            |           |
| zinc contributes to the maintenance of normal bones                             |           |
| zinc contributes to the maintenance of normal hair                              |           |
| zinc contributes to the maintenance of normal nails                             |           |
| zinc contributes to the maintenance of normal skin                              |           |
| zinc contributes to the maintenance of normal vision                            |           |
| zinc has a role in the process of cell division                                 |           |

zinc contributes to normal acid-base metabolism  
zinc contributes to normal metabolism of vitamin A  
zinc contributes to normal protein synthesis  
zinc contributes to the maintenance of normal testosterone levels in the blood  
vitamin A contributes to normal iron metabolism  
vitamin A contributes to the maintenance of normal vision  
vitamin A has a role in the process of cell specialization  
niacin contributes to normal functioning of the nervous system  
niacin contributes to normal psychological function  
vitamin B<sub>6</sub> contributes to normal cysteine synthesis  
vitamin B<sub>6</sub> contributes to normal functioning of the nervous system  
vitamin B<sub>6</sub> contributes to normal homocysteine metabolism  
vitamin B<sub>6</sub> contributes to normal protein and glycogen metabolism  
vitamin B<sub>6</sub> contributes to normal psychological function  
vitamin B<sub>6</sub> contributes to normal red blood cell formation  
vitamin B<sub>6</sub> contributes to the regulation of hormonal activity  
vitamin B<sub>12</sub> contributes to normal functioning of the nervous system  
vitamin B<sub>12</sub> contributes to normal homocysteine metabolism  
vitamin B<sub>12</sub> contributes to normal psychological function  
vitamin B<sub>12</sub> contributes to normal red blood cell formation  
vitamin B<sub>12</sub> has a role in the process of cell division

---

**Supplementary Figure S1.** (A) Number of health claims (HC) related to specific health benefits for SM; (B) Number of health claims related to specific health benefits for SMBP.

A)

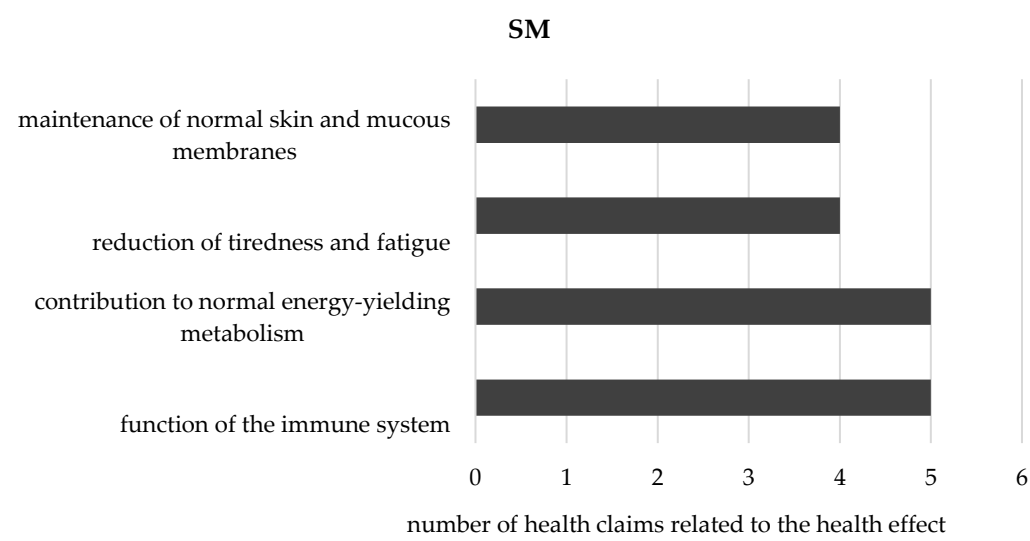

B)

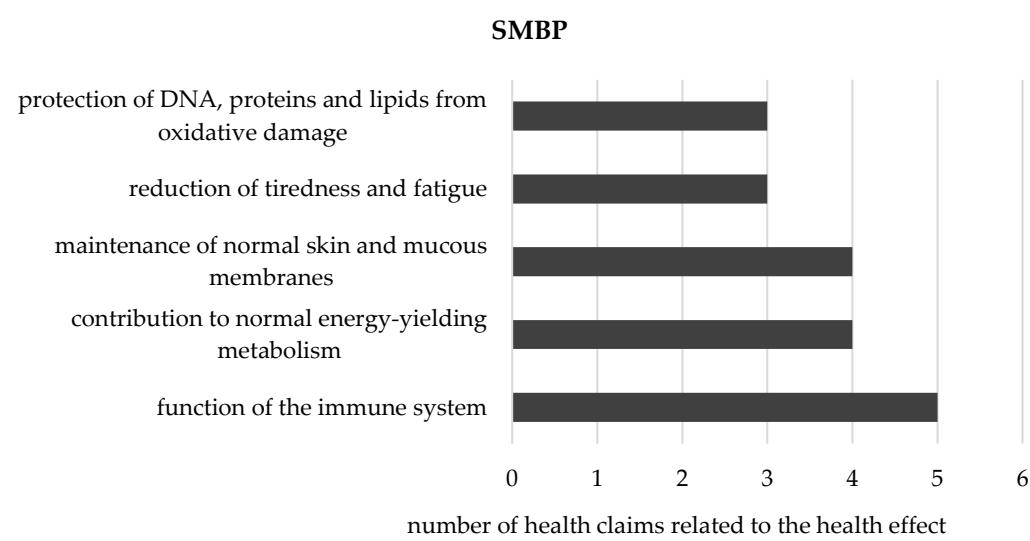

Supplement: s1 [file s1]
